# Supplementary material for: Effect of a Low-Calorie Dietary Intervention on Liver Health and Body Weight in Adults with Metabolic-Dysfunction Associated Steatotic Liver Disease (MASLD) and Overweight/Obesity: A Systematic Review and Meta-Analysis
Source: MDPI journal article supplement (doi:10.3390/nu16071030), 2024-04-01
Supplement: s1 [file s1]

## ***Supplementary Materials***

# **Effect of a Low-Calorie Dietary Intervention on Liver Health and Body Weight in Adults with Metabolic-Dysfunction Associated Steatotic Liver Disease (MASLD) and Overweight/Obesity: A Systematic Review and Meta-Analysis**

Laurence J. Dobbie <sup>1,2,†</sup>, Jamie Burgess <sup>1,3,†</sup>, Azlinda Hamid <sup>1</sup>, Sarah J. Nevitt <sup>4,5</sup>, Theresa J. Hydes <sup>1,3</sup>, Uazman Alam <sup>1,3</sup> and Daniel J. Cuthbertson <sup>1,3,\*</sup>

## Supplementary Methods S1: Search Strategy for Databases

1. "NON-ALCOHOLIC FATTY LIVER DISEASE"/
2. ("non alcoholic fatty liver disease" OR "non-alcoholic fatty liver disease" OR "NAFLD" OR "metabolic associated liver disease" OR "non-alcoholic steatosis" OR "non-alcoholic steatohepatitis") ti.ab
3. (1 OR 2)
4. "CALORIC RESTRICTION"/
5. ("low-calorie diet\*" OR "low calorie diet\*" OR "LCD" OR "800kcal-1500kcal" OR "800kcal - 1500kcal" OR "800 to 1500 calories" OR "800 calories to 1500 calories" OR "meal replacement\*" OR "isocaloric diet\*") ti,ab
6. (diet OR diets).ti,ab
7. ("low fat" OR "low-saturated fat" OR "low saturated fat" OR "low carbohydrate" OR "low carb\*") ti.ab
8. (6 AND 7)
9. (4 OR 5 OR 8)
10. (3 AND 9)
11. "GASTRIC BYPASS"/
12. ("Gastric Bypass" OR "weight loss surgery" OR "gastric band" OR "gastric sleeve" OR "Roux-en-Y bypass") ti.ab
13. (11 OR 12)
14. (3 AND 13)

## Figure S1: Quality Assessment

### (A) Cochrane Risk of Bias Tool Assessment of randomised controlled trials

| Study ID              | Experimental               | Comparator                      | D1 | D2 | D3 | D4 | D5 | Overall |                                                                                                                                                                                                                                                                                      |
|-----------------------|----------------------------|---------------------------------|----|----|----|----|----|---------|--------------------------------------------------------------------------------------------------------------------------------------------------------------------------------------------------------------------------------------------------------------------------------------|
| Aller, 2014           | LCD - high monounsaturated | LCD - high polyunsaturated diet | !  | !  | +  | +  | !  | !       | <div> <div>+</div> Low risk           <div>!</div> Some concerns           <div>-</div> High risk         </div>                                                                                                                                                                     |
| Asghari, 2022         | LCD                        | Control                         | +  | +  | +  | +  | +  | +       |                                                                                                                                                                                                                                                                                      |
| Chen, 2020            | Low Carb High Fibre        | Control                         | +  | -  | +  | -  | !  | -       |                                                                                                                                                                                                                                                                                      |
| Cunha, 2020           | VLC KD                     | LCD                             | +  | !  | +  | +  | !  | !       | <div> <div>D1</div> Randomisation process           <div>D2</div> Deviations from the intended interventions           <div>D3</div> Missing outcome data           <div>D4</div> Measurement of the outcome           <div>D5</div> Selection of the reported result         </div> |
| El-Kader, 2017        | Lifestyle modification     | Control                         | !  | -  | !  | +  | !  | -       |                                                                                                                                                                                                                                                                                      |
| Gepner, 2019          | Green-MED / MED            | LFD                             | +  | +  | +  | +  | +  | +       |                                                                                                                                                                                                                                                                                      |
| Marin-Alejandro, 2019 | FLIO                       | AHA                             | !  | +  | +  | +  | !  | !       |                                                                                                                                                                                                                                                                                      |
| Meir, 2021            | MED                        | HDG                             | +  | +  | +  | +  | +  | +       |                                                                                                                                                                                                                                                                                      |
| Montemayor, 2022      | MED                        | LCD                             | +  | +  | +  | +  | +  | +       |                                                                                                                                                                                                                                                                                      |
| Promrat, 2009         | Lifestyle intervention     | Control                         | +  | !  | +  | +  | !  | !       |                                                                                                                                                                                                                                                                                      |
| Ristic-Medic, 2020    | MED                        | LFD                             | +  | +  | +  | +  | !  | +       |                                                                                                                                                                                                                                                                                      |
| Sattar, 2022          | LCD                        | Control                         | +  | +  | +  | +  | +  | +       |                                                                                                                                                                                                                                                                                      |
| Taylor, 2018          | LCD                        | Control                         | +  | +  | +  | +  | +  | +       |                                                                                                                                                                                                                                                                                      |

### (B) ROBINS-I Tool assessment of non-randomised studies

| Study          | Bias due to confounding | Bias in selection of participants into the study | Bias in classification of interventions | Bias due to deviations from intended interventions | Bias due to missing data | Bias in measurement of outcomes | Bias in selection of the reported result | Overall Bias |
|----------------|-------------------------|--------------------------------------------------|-----------------------------------------|----------------------------------------------------|--------------------------|---------------------------------|------------------------------------------|--------------|
| Browning, 2011 | Serious                 | Low                                              | Low                                     | Serious                                            | Low                      | Serious                         | Moderate                                 | Serious      |
| Elias, 2010    | Serious                 | Moderate                                         | Serious                                 | Critical                                           | Low                      | Serious                         | Low                                      | Critical     |

Reference: [12,13,22,26–40]

**Figure S2: LCD, ALT Funnel Plot**

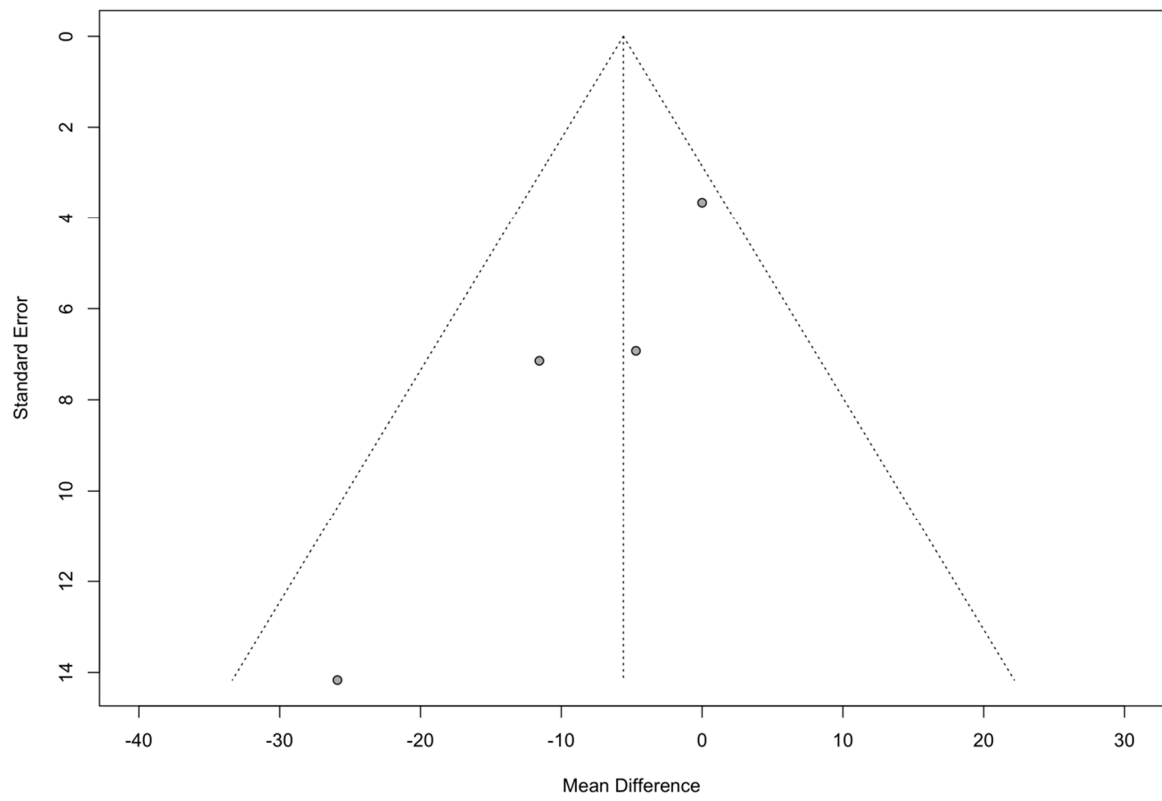

**Figure S3: LCD AST Funnel Plot**

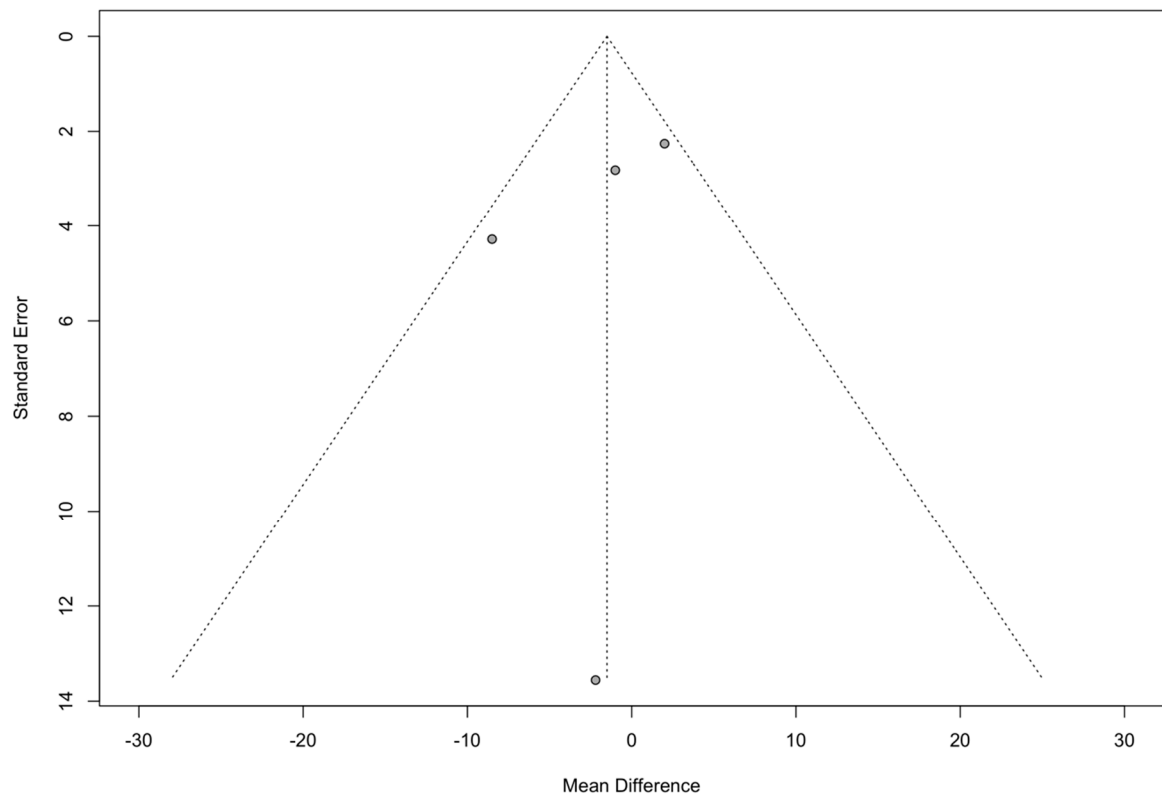

**Figure S4: LCD Body Weight LCD Funnel Plot**

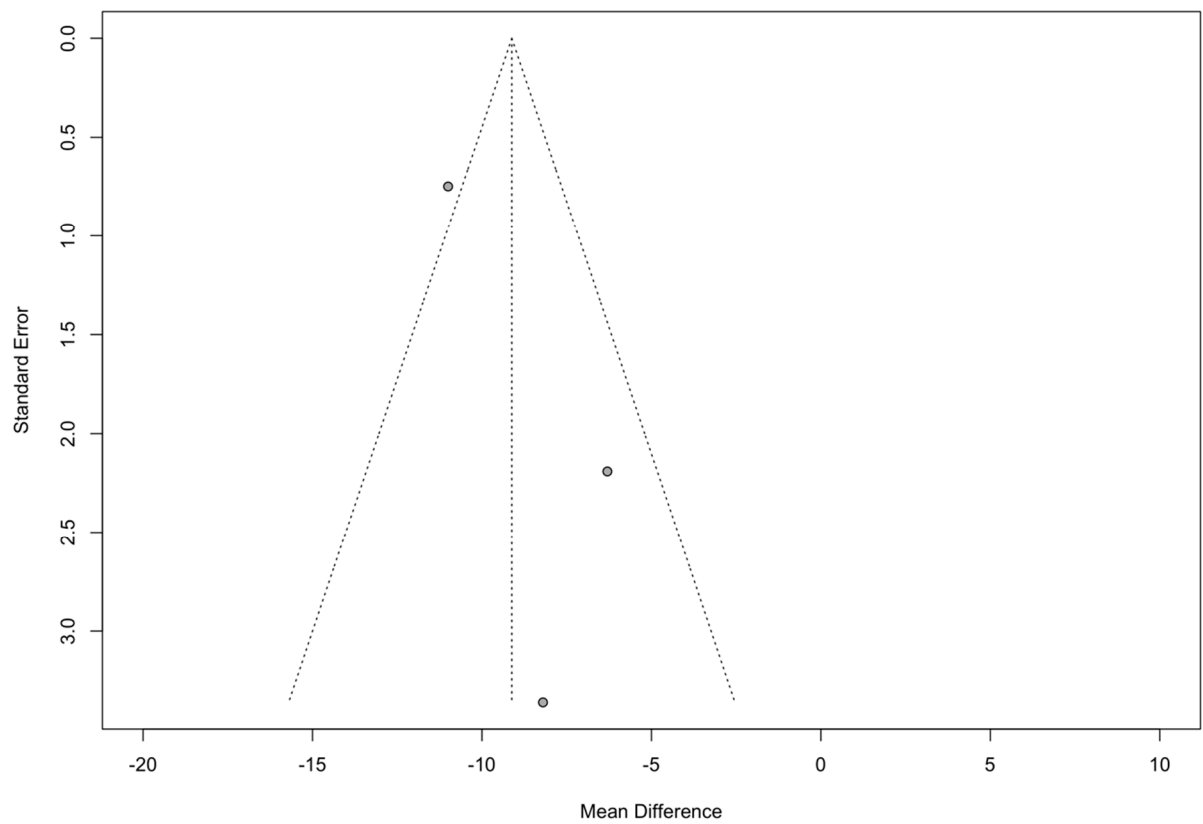

**Figure S5: LCD Intrahepatic Liver Fat Funnel Plot**

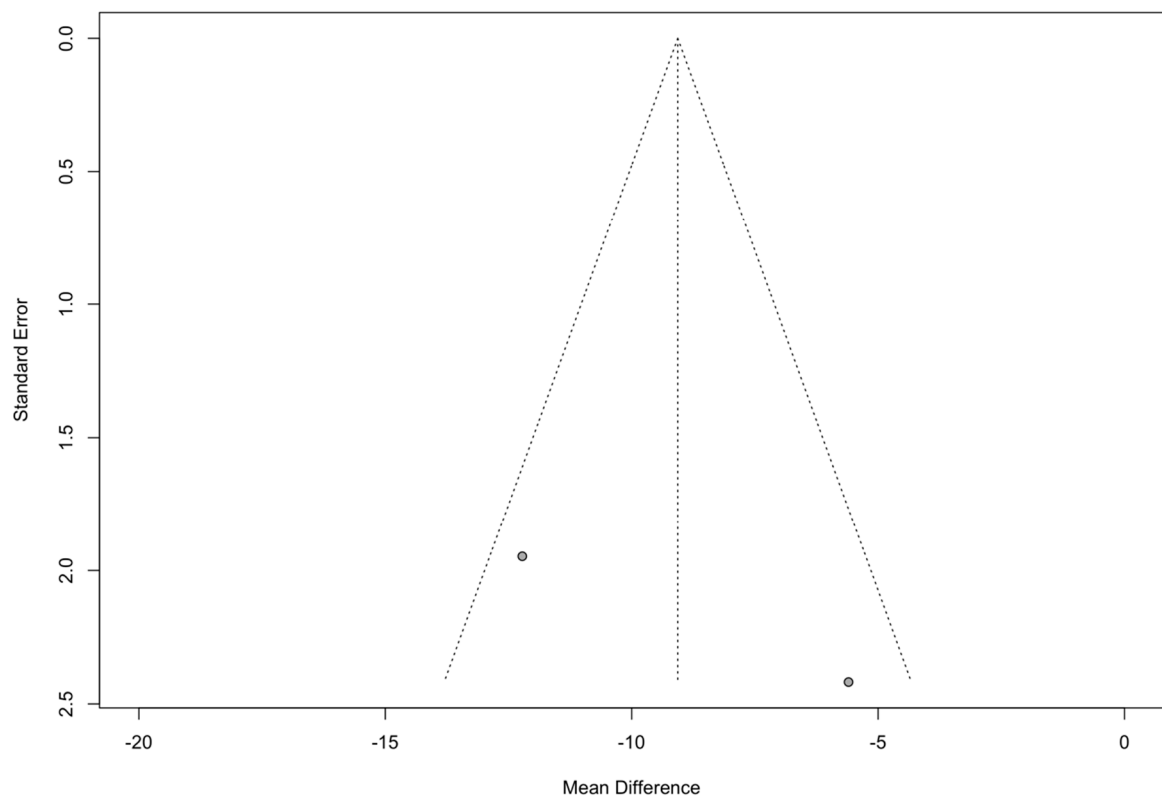

**Figure S6: Mediterranean-LCD Body Weight Funnel Plot**

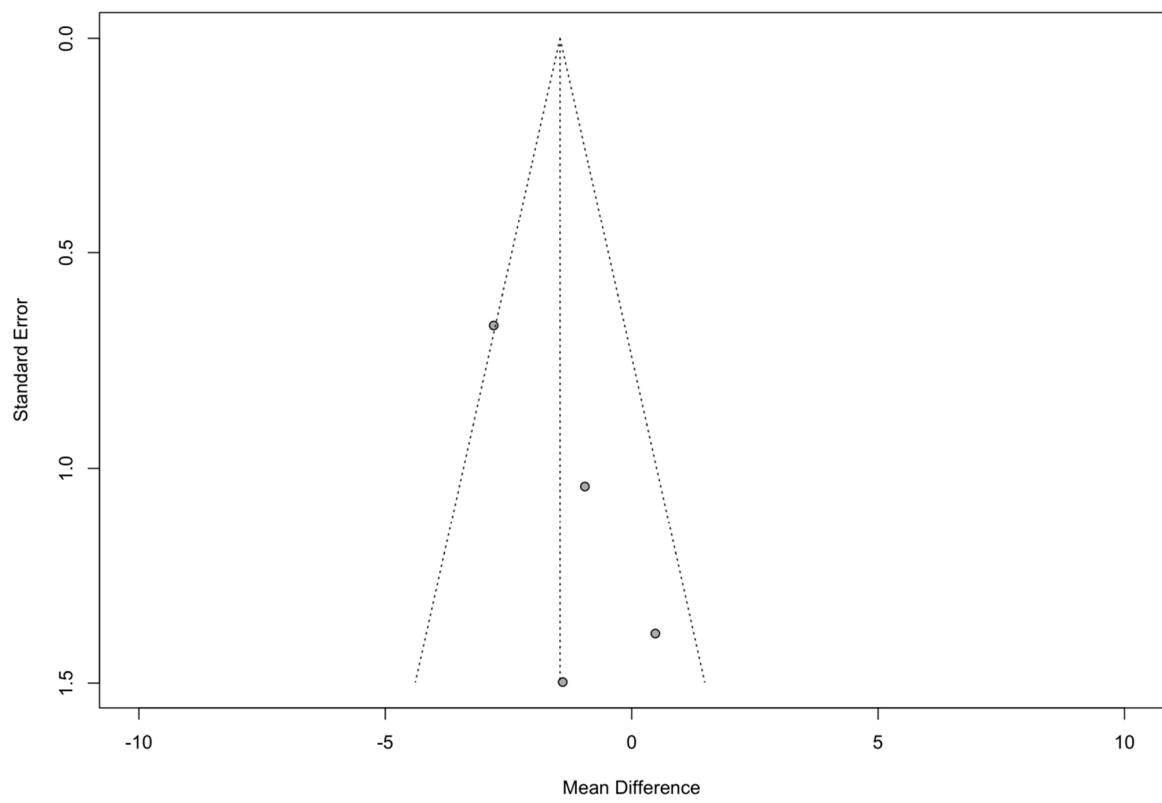



**Figure S7: Mediterranean-LCD ALT Funnel Plot**

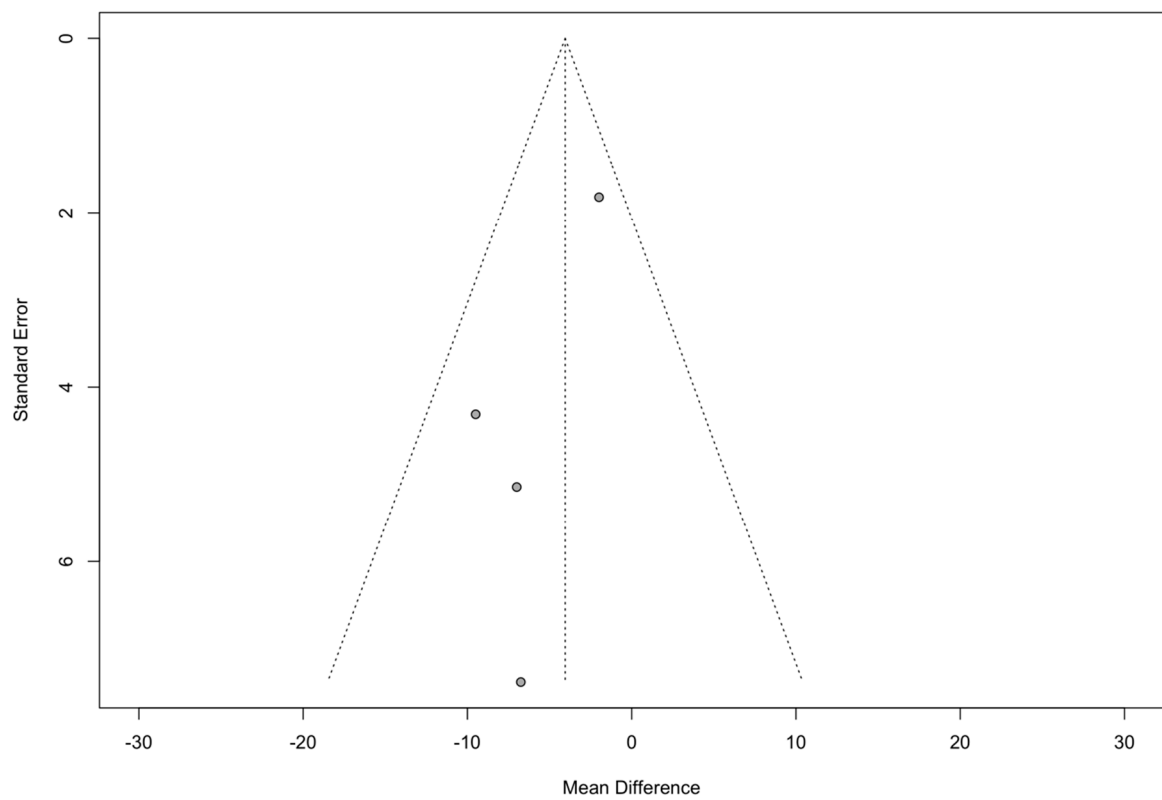

**Figure S8: Mediterranean-LCD AST Funnel Plot**

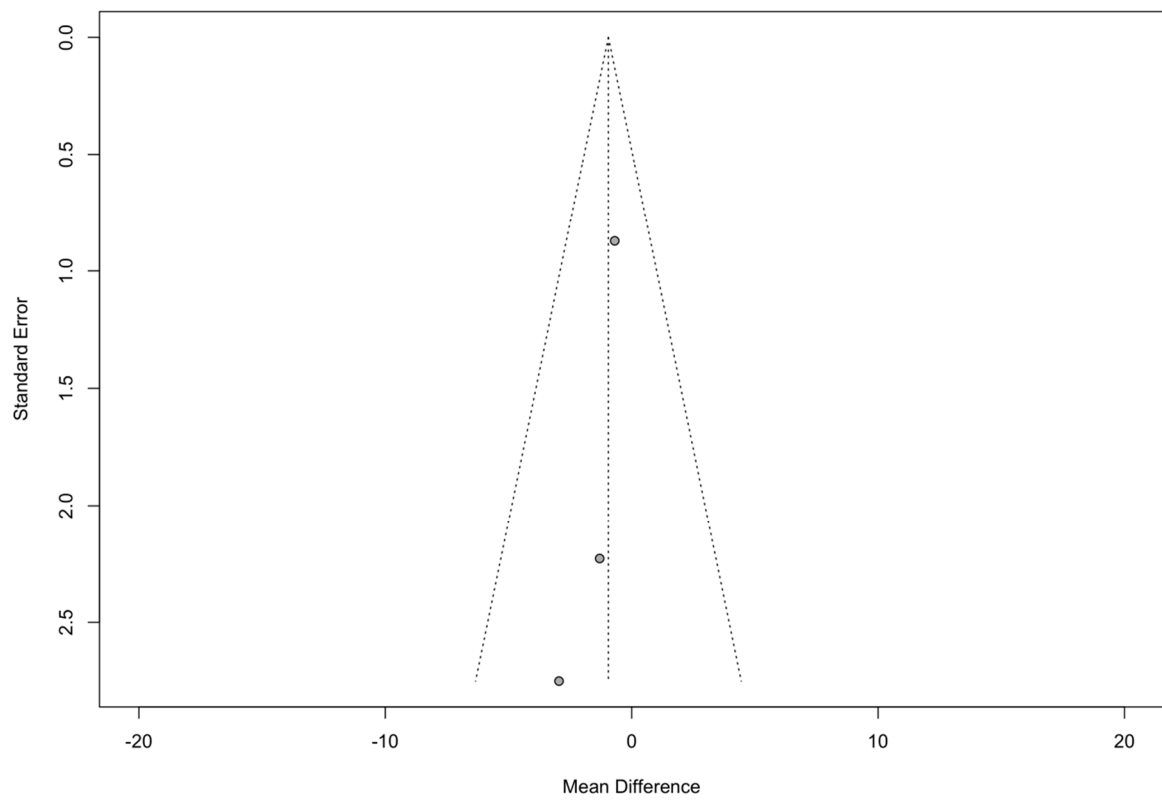

**Table S1: Included Study Characteristics**

| Study                 | Design                            | Study Arms                                           | Recruitment Source                                                   | Study Arm 1                                                                                                 | Study Arm 2                                                                                                                                                                                                                                                                                                                                                                                                                                                                                                                                                                                                                                    | Study Arm 3 (or Arm 2 cont) |
|-----------------------|-----------------------------------|------------------------------------------------------|----------------------------------------------------------------------|-------------------------------------------------------------------------------------------------------------|------------------------------------------------------------------------------------------------------------------------------------------------------------------------------------------------------------------------------------------------------------------------------------------------------------------------------------------------------------------------------------------------------------------------------------------------------------------------------------------------------------------------------------------------------------------------------------------------------------------------------------------------|-----------------------------|
| <b>LCD vs Control</b> |                                   |                                                      |                                                                      |                                                                                                             |                                                                                                                                                                                                                                                                                                                                                                                                                                                                                                                                                                                                                                                |                             |
| Asghari, 2022 [41]    | Iran<br>RCT<br>01/2016 – 06/2016  | LCD vs control<br>Arm-1: Control<br>Arm-2: LCD       | Golgasht<br>Outpatient Clinic<br>University of<br>Tabriz (Iran)      | <b>Control Group</b><br><br>Healthy eating and weight control advice.                                       | <b>LCD Group</b><br><br>Calorie restriction treatment.<br>Targeted to lose a maximum of 10% of their baseline body weight.<br>To restrict calories, 500 to 1000 kcal/day (depending on body weight) was deducted from the estimated energy requirements.<br>A dietitian fully informed participants of both groups about the healthy eating fundamentals.<br>Individual interviews during follow-up visits every two weeks to assess adherence to the prescribed diet plan, discuss and resolve any barriers or concerns related to the diet and encourage compliance.<br><br>Energy Composition<br>17% protein<br>30% fat<br>53% carbohydrate |                             |
| 2020, Chen [36]       | China<br>RCT<br>10/2015 – 05/2017 | LCD vs Control<br>Arm 1: Control<br>Study Arm 2: LCD | A clinic of<br>Huadong Hospital<br>affiliated to<br>Fudan University | <b>Control</b><br><br>Face-to-face counselling with lifestyle guidance and weekly phone call from dietitian | <b>LCD</b><br><br>1000-1200kcal/day<br>400g/day vegetables<br>1800ml/day water<br><br>Energy Composition<br>20-25% carbohydrates<br>40-45% Protein (beans, nuts, soy milk, chicken and fish)<br>30-35% Fats, n-3 and n-6 polyunsaturated fatty acids<br>Low saturated fatty acid intake.<br>5g/day dietary fibre supplement<br>Calcium + magnesium tablets 2x/day                                                                                                                                                                                                                                                                              |                             |

|                        |                                 |                                                                               |                                                                                                        |                                                                                         |                                                                                                                                                                                                                                                                                                                                                                                                                                        |
|------------------------|---------------------------------|-------------------------------------------------------------------------------|--------------------------------------------------------------------------------------------------------|-----------------------------------------------------------------------------------------|----------------------------------------------------------------------------------------------------------------------------------------------------------------------------------------------------------------------------------------------------------------------------------------------------------------------------------------------------------------------------------------------------------------------------------------|
|                        |                                 |                                                                               |                                                                                                        |                                                                                         | Multivitamins 2x/day<br>Low Glycaemic Index                                                                                                                                                                                                                                                                                                                                                                                            |
| Elias, 2010<br>[37]    | Brazil<br>Cohort<br>2005 - 2008 | Adherent vs non-adherent to LCD<br><br>Arm 1: Non-adherent<br>Arm 2: Adherent | Gastroenterology outpatient clinic of the Federal University of Sao Paulo                              | <b>Non-adherent to LCD</b><br><br><5% weight loss defined those as non-adherent to LCD. | <b>Adherent to LCD</b><br><br>500-1000kcal/day Reduction<br>Nutritional instructions according the clinical guidelines from National Institute of Health and Northern American Association for Study of Obesity<br><br>Energy Composition<br>55% Carbohydrates<br>30% Total Fat<br>8-10% Saturated fats<br>>15% Monounsaturated fats<br>>10% Polyunsaturated fats<br>15% Protein<br><300mg/day Dietary Cholesterol<br>20-30g/day Fibre |
| El-Kader, 2016<br>[38] | Saudi Arabia<br>RCT             | Lifestyle vs control<br><br>Arm 1: Control<br>Arm 2: Lifestyle                | Internal Medicine Department at King Abdul Aziz University Hospital and other Hospitals at Jeddah Area | <b>Control</b><br><br>Maintain ordinary current lifestyle                               | <b>Lifestyle Intervention</b><br><br>Energy Intake: 1200kcal/day<br>Exercise training programme: treadmill based training programme at 65-75% of maximal HR, 30min sessions, 3x/week<br><br>Energy Composition<br>50-55% Carbohydrates<br>30-35% Fat<br>15% Protein                                                                                                                                                                    |

|                       |                           |                                                                |                                                                   |                                                                                                                                               |                                                                                                                                                                                                                                                                                                                                                                                                                                                                                                                                                                                                                                                                                                                                                      |
|-----------------------|---------------------------|----------------------------------------------------------------|-------------------------------------------------------------------|-----------------------------------------------------------------------------------------------------------------------------------------------|------------------------------------------------------------------------------------------------------------------------------------------------------------------------------------------------------------------------------------------------------------------------------------------------------------------------------------------------------------------------------------------------------------------------------------------------------------------------------------------------------------------------------------------------------------------------------------------------------------------------------------------------------------------------------------------------------------------------------------------------------|
| Promrat, 2009 [39]    | USA RCT 01/2005 – 02/2007 | Lifestyle vs Control<br><br>Arm 1: Control<br>Arm 2: Lifestyle | Newspaper advertisement and local physicians in Rhode Island, USA | <b>Control</b><br><br>Small group sessions about NASH and principles of healthy eating, physical activity and weight control, every 12 weeks. | <b>Lifestyle Intervention</b><br><br>Assigned a calorie goal based on starting weight: 1000-1200 kcal/day if baseline weight <200 lb or 1200-1500/day if baseline weight >200 lb.<br>Dietary recommendations in this study were consistent with the recommendations of the American Heart Association, the American Diabetic Association, and the American College of Sports Medicine.<br><br>Weight loss lifestyle intervention based on Diabetes Prevention Program and Look AHEAD. 7-10% weight loss goal in 6 months, then WL maintenance.<br>Small group nutritional sessions every week for 6 months, then biweekly for months 7-12.<br>Also adhered to Portion Controlled Diet and Higher Exercise goals<br><br>Energy Composition<br>25% Fat |
| <b>TMR vs Control</b> |                           |                                                                |                                                                   |                                                                                                                                               |                                                                                                                                                                                                                                                                                                                                                                                                                                                                                                                                                                                                                                                                                                                                                      |

|                                                              |                                                                      |                                                                                                                                                           |                                             |                                                                                                                                                                                                                                                                |                                                                                                                                                                                                                                                                                                                                                                                                                                                                                                                                                                                                                                                                                                                                                                                                                                                                                         |
|--------------------------------------------------------------|----------------------------------------------------------------------|-----------------------------------------------------------------------------------------------------------------------------------------------------------|---------------------------------------------|----------------------------------------------------------------------------------------------------------------------------------------------------------------------------------------------------------------------------------------------------------------|-----------------------------------------------------------------------------------------------------------------------------------------------------------------------------------------------------------------------------------------------------------------------------------------------------------------------------------------------------------------------------------------------------------------------------------------------------------------------------------------------------------------------------------------------------------------------------------------------------------------------------------------------------------------------------------------------------------------------------------------------------------------------------------------------------------------------------------------------------------------------------------------|
| DIRECT<br>(metabolic<br>substudy)<br>Taylor, 2018<br>[12,13] | UK<br>Cluster RCT<br>07/2014 –<br>08/2017                            | LCD vs Control<br><br>Arm 1: Control<br>Arm 2: LCD                                                                                                        | Recruited via<br>their general<br>practices | <b>Control</b><br><br>Continued usual diabetes<br>management by their GP<br>practice according to current UK<br>clinical guidelines.                                                                                                                           | <b>LCD</b><br><br>Stopped all anti-diabetic medication on day 1 of the Counterweight Plus weight<br>management programme consisting of 825–853 kcal/d liquid formula diet (Cambridge<br>Weight Plan Ltd., UK) continued for 12-20 weeks, followed by a 2-6 week food<br>reintroduction phase, then ongoing support for weight maintenance.<br><br>Total diet replacement phase using a low energy formula diet for 3-5 months<br>825–853kcal/day<br>59% carbohydrate<br>13% fat<br>26% protein<br>2% fibre<br><br>Structured food reintroduction of 2–8 weeks<br>50% carbohydrate<br>35% total fat<br>15% protein<br><br>Step counters were provided at the start of food reintroduction, and physical activity<br>strategies were introduced, to help participants in the intervention group to reach<br>and maintain their individual sustainable maximum—up to 15 000 steps per day. |
| STANDby,<br>Sattar, 2022<br>[40]                             | UK<br>RCT with<br>observational<br>follow-up<br>02/2019 –<br>07/2021 | Immediate LCD<br>vs Delayed LCD<br><br>Arm 1: Control<br>Arm 2: LCD<br><br>Further analysis<br>of the delayed<br>LCD group, who<br>went on to have<br>LCD | Recruited via<br>general practice           | <b>Delayed TDR</b><br><br>Usual care, managed under<br>current NHS clinical guidelines,<br>for three months before<br>returning to receive the<br>intervention. Asked to maintain<br>weight in the initial control<br>period, and wait until TMR<br>commenced. | <b>Immediate TDR</b><br><br>Counterweight Plus programme which was used in the DiRECT trial.<br>Delivered by dietitians experienced in Counterweight Plus programme delivery,<br>comprised a Total Diet Replacement phase (TDR: an 825–853 kcal/day formula diet)<br>for 3–5 months (flexible duration to accommodate participants with commitments or<br>practical limitations due to COVID-19), and then stepped food reintroduction (FR) for<br>six-eight weeks.<br><br>On completion of FR period participants were given advice, and written information,<br>on maintaining weight loss, and returned to the care of their GP, who was informed<br>of the trial and their patient's progress.                                                                                                                                                                                      |

## MED-LCD vs LCD

|                                                                                       |                                       |                                                                       |                                                                         |                                                                                                                                                                                                                                                                                                                                                                                                                                                                                                                 |                                                                                                                                                                                                                                                                                                                                                                                                                                                                                                                                                                                                                                                                                                                           |
|---------------------------------------------------------------------------------------|---------------------------------------|-----------------------------------------------------------------------|-------------------------------------------------------------------------|-----------------------------------------------------------------------------------------------------------------------------------------------------------------------------------------------------------------------------------------------------------------------------------------------------------------------------------------------------------------------------------------------------------------------------------------------------------------------------------------------------------------|---------------------------------------------------------------------------------------------------------------------------------------------------------------------------------------------------------------------------------------------------------------------------------------------------------------------------------------------------------------------------------------------------------------------------------------------------------------------------------------------------------------------------------------------------------------------------------------------------------------------------------------------------------------------------------------------------------------------------|
| CENTRAL<br>Gepner, 2019<br>[28,29]                                                    | Israel<br>RCT<br>10/2012 –<br>04/2014 | MED LCD vs AHA<br>LCD<br>Arm 1: Control<br>AHA LCD<br>Arm 2: MED LCD  | Isolated research<br>centre workplace<br>in Israel                      | <b>AHA Low-Fat LCD</b><br>(High carbohydrate + Low-saturated fat diet)<br><br>Calorie restricted<br>6 months in 50% randomised to PA, 50% no-PA.<br>Nutritional counselling: whole grains, vegetables, fruits and legumes, limits consumption of additional fats, sweets, high-fat snacks.<br><br><b>Energy Composition</b><br>Total Fat: <= 35%<br>Saturated Fat: <= 7-10% Dietary cholesterol: <= 300mg trans fats not recommended<br>Carbohydrates: > 55%, Not restricted.<br>Fibre: increased whole grains. | <b>MED-LCD</b><br>(Low-carbohydrate + high mono-unsaturated fat diet)<br><br>Calorie restricted<br>6 months in 50% randomised to PA, 50% no-PA.<br>Nutritional counselling: Rich in vegetables and legumes, and low in red meat, with poultry and fish replacing beef/lamb.<br><br>Energy Composition<br>Carbohydrate: <40gr/day for 2 months, then gradually increasing to <80gr/day<br>Total Fat: liberal, expected >40%<br>Saturated Fat: Not specifically restricted<br>Dietary Cholesterol: not specifically restricted.<br>Trans Fat: not recommended<br>45gr/day Virgin Olive Oil (at least 20% monounsaturated fat)<br>25gr/day nuts<br>Fish 2x/week<br>28g/day walnuts (160kcal), starting 3 <sup>rd</sup> month |
| FLiO<br>Marin-Alejandre,<br>2019/2022<br>(Nutrients / Liver International)<br>[30,31] | Spain<br>RCT<br>06/2016 –<br>06/2018  | FLiO vs AHA<br>Arm 1: Control<br>AHA LCD<br>Arm 2: FLiO LCD (MED-LCD) | Individuals with confirmed hepatic steatosis via USS in Navarra, Spain. | <b>AHA LCD</b><br><br>30% energy restricted LCD<br>10,000 steps/day activity recommendation<br>7 day menu plan<br><br>Energy Composition<br>3-5 meals/day<br>Carbohydrates: 50-55% total kcal<br>Protein: 15% total kcal<br>Lipids: 30% total kcal                                                                                                                                                                                                                                                              | <b>FLiO (MED-LCD with high-meal frequency)</b><br><br>30% energy restricted diet<br>10,000 steps/day activity recommendation<br>7 day menu plan<br><br>Energy Composition<br>7 meals/day -> breakfast, lunch, dinner, 2 snacks AM + PM<br>Carbohydrates: 40-45% kcal (low GI)<br>Proteins: 25% kcal (mainly vegetable source)<br>Lipids: 30-35% kcal (extra virgin olive oil + Omega-3 fatty acids rather than saturated / trans-fats)                                                                                                                                                                                                                                                                                    |

|                                       |                                       |                                                                                                                                                         |                                                                                               | Healthy Fatty Acid Profile                                                                                                                                                                                                                                                                                                                                                                                                                                                                     | High adherence to Mediterranean diet                                                                                                                                                                                                                                                                                                                                                                                                                                                                                                                                                                                                                                                                                    |                                                                                                                                                                                                                                                                                                                                                                                                                                                                                                                                                                                                                                                                                                                                                                                                                                                 |
|---------------------------------------|---------------------------------------|---------------------------------------------------------------------------------------------------------------------------------------------------------|-----------------------------------------------------------------------------------------------|------------------------------------------------------------------------------------------------------------------------------------------------------------------------------------------------------------------------------------------------------------------------------------------------------------------------------------------------------------------------------------------------------------------------------------------------------------------------------------------------|-------------------------------------------------------------------------------------------------------------------------------------------------------------------------------------------------------------------------------------------------------------------------------------------------------------------------------------------------------------------------------------------------------------------------------------------------------------------------------------------------------------------------------------------------------------------------------------------------------------------------------------------------------------------------------------------------------------------------|-------------------------------------------------------------------------------------------------------------------------------------------------------------------------------------------------------------------------------------------------------------------------------------------------------------------------------------------------------------------------------------------------------------------------------------------------------------------------------------------------------------------------------------------------------------------------------------------------------------------------------------------------------------------------------------------------------------------------------------------------------------------------------------------------------------------------------------------------|
| FLIPAN<br>Montemayor,<br>2022<br>[26] | RCT<br>Spain<br>06/2018 –<br>01/2020  | LCD vs MED-HMF<br>vs MED-PA<br><br>Arm 1:<br>Conventional<br>Diet (CD)<br>Arm 2: MED-high<br>meal frequency<br>Arm 3: MED-<br>with physical<br>activity | Not Stated                                                                                    | <b>Control</b><br><br>American Association for the<br>Study of Liver Disease (AASLD)<br>recommendations:<br>Energy restriction enough to lose<br>3–5% of body weight to improve<br>steatosis, and 7–10% to improve<br>most of the histopathological<br>features of NAFLD/NASH,<br>including fibrosis<br><br>Energy Composition<br>20–35% fat<br>10–35% protein<br>45–65% carbohydrate<br>Fiber 25 g/day<br>Cholesterol <250 mg/day<br><br>Minimum 10,000 steps/day<br>(recorded via pedometer) | <b>Mediterranean Diet–high meal<br/>frequency (MD–HMF)</b><br><br>Energy Composition<br>30–35% fat (mainly mono- and poly-<br>unsaturated fatty acids from extra virgin<br>olive oil, nuts, and omega-3 containing<br>foods)<br>25% protein (mainly from vegetable<br>sources)<br>40–45% carbohydrates (50–70% of the<br>total carbohydrate intake should be low<br>glycemic index and rich in fiber).<br>-7 meals/day, gradual reduction of caloric<br>content at each main meal, with the<br>highest calorie meals to be consumed<br>early during the day (breakfast, lunch,<br>dinner and two snacks in the morning<br>and two snacks in the afternoon).<br><br>Minimum 10,000 steps/day (recorded via<br>pedometer) | <b>Mediterranean Diet–physical activity<br/>(MD–PA)</b><br><br>Energy-restricted MedDiet.<br>meal frequency was of 4–5 meals a day<br>including snacks.<br><br>Energy Composition<br>-35–40% fat (8–10% of saturated fatty<br>acids, >20% of monounsaturated fatty<br>acids, >10% of polyunsaturated fatty<br>acids and <300 mg/day of cholesterol)<br>-20% proteins<br>40–45% carbohydrates (low GI)<br>-Sodium chloride <6 g/day<br>-Dietary fiber >30–35 g/day<br><br>35 min interval training session three<br>times a week, with a combination of two<br>instructor-led on-site training sessions<br>and one remote prescribed training<br>session a week for the whole duration of<br>the trial. Physical activity sessions of 35<br>min consisted of 5 min warm-up, 20 min<br>interval training, and 10 min breathing<br>and stretching. |
| Ristic-Medic,<br>2020<br>[34]         | Serbia<br>RCT<br>02/2013 –<br>03/2015 | MED LCD vs LFD<br><br>Arm 1: LFD<br>Arm 2: MED LCD                                                                                                      | Centre of<br>Research in<br>Nutrition and<br>Metabolism,<br>Institute for<br>Medical Research | <b>LFD</b><br><br>600-800kcal/day reduction (30%<br>reduction)<br>Personalised Nutritional<br>Counselling<br>30min/day walking increase                                                                                                                                                                                                                                                                                                                                                        | <b>MED-LCD</b><br><br>600-800kcal/day kcal reduction<br>Personalised Nutritional Counselling<br>30min/day walking increase<br>Target for 5% initial body weight loss.<br>Breakfast, lunch, dinner, one morning snack, one afternoon snack.                                                                                                                                                                                                                                                                                                                                                                                                                                                                              |                                                                                                                                                                                                                                                                                                                                                                                                                                                                                                                                                                                                                                                                                                                                                                                                                                                 |



|                                                       |                                       |                                                                                              |                                                                                 |                                                                                                                                                                                                                                                                                                                                                 |                                                                                                                                                                                                                                                                                                                                                                                                                                                                                                                                                                                                                                                    |                                                                                                                                                                                                                                                                                                                                                                                                                                                                                                                                                                                                                                                                                          |
|-------------------------------------------------------|---------------------------------------|----------------------------------------------------------------------------------------------|---------------------------------------------------------------------------------|-------------------------------------------------------------------------------------------------------------------------------------------------------------------------------------------------------------------------------------------------------------------------------------------------------------------------------------------------|----------------------------------------------------------------------------------------------------------------------------------------------------------------------------------------------------------------------------------------------------------------------------------------------------------------------------------------------------------------------------------------------------------------------------------------------------------------------------------------------------------------------------------------------------------------------------------------------------------------------------------------------------|------------------------------------------------------------------------------------------------------------------------------------------------------------------------------------------------------------------------------------------------------------------------------------------------------------------------------------------------------------------------------------------------------------------------------------------------------------------------------------------------------------------------------------------------------------------------------------------------------------------------------------------------------------------------------------------|
|                                                       |                                       |                                                                                              |                                                                                 | <p>Target for 5% initial body weight loss.</p> <p>Breakfast, lunch, dinner, one morning snack, one afternoon snack.</p> <p>Energy Composition</p> <p>Carbohydrates: 60% kcal (low Glycaemic index)</p> <p>Protein: 15% kcal</p> <p>Lipids: 25% kcal</p> <p>Balanced in micronutrient content (vitamins + minerals)</p>                          | <p>Energy Composition</p> <p>Carbohydrates: 50% kcal</p> <p>Proteins: 15% kcal</p> <p>Lipids: 30% kcal</p> <p>Balanced in micronutrient content (vitamins + minerals)</p>                                                                                                                                                                                                                                                                                                                                                                                                                                                                          |                                                                                                                                                                                                                                                                                                                                                                                                                                                                                                                                                                                                                                                                                          |
| GREEN-MED LCD                                         |                                       |                                                                                              |                                                                                 |                                                                                                                                                                                                                                                                                                                                                 |                                                                                                                                                                                                                                                                                                                                                                                                                                                                                                                                                                                                                                                    |                                                                                                                                                                                                                                                                                                                                                                                                                                                                                                                                                                                                                                                                                          |
| DIRECT-Plus<br>Tsaban, 2021<br>Meir, 2021<br>[22, 27] | Israel<br>RCT<br>05/2017 –<br>11/2018 | MED vs Green-<br>MED vs Control<br>Arm 1: HDGI<br>Arm 2: MED LCD<br>Arm 3: Green-<br>MED LCD | Isolated<br>workplace at<br>Nuclear Research<br>Centre Negev,<br>Dimona, Israel | <p><b>Healthy Dietary Group (HDG)</b></p> <p>Standard nutritional counselling</p> <p>18 month gym membership:</p> <p>45-60mins aerobic exercise + resistance training 3-4/week</p> <p>Lifestyle Group Sessions</p> <p>Dietary Advice: Limit dietary cholesterol, trans-fat, saturated-fat, sugars, and salt. Increase intake of vegetables.</p> | <p><b>Mediterranean Diet</b></p> <p>Calorie restricted Mediterranean diet</p> <p>Women: 1200-1400kcal/day</p> <p>Men: 1500-1800kcal/day</p> <p>18 month gym membership -&gt; 45-60mins aerobic exercise + resistance training 3-4/week</p> <p>Lifestyle Group Sessions</p> <p>Energy Composition</p> <p>Fat: ~40% (mainly PUFA and MUFA)</p> <p>Carbohydrates: &lt;40g/day in 1<sup>st</sup> 2 months, then increased up to 80g/day.</p> <p>Less/avoid red + processed meats.</p> <p>Polyphenols: 440mg/day (from 28g/day walnuts)</p> <p>Reduced Poultry intake</p> <p>Dietary guidance: Limit dietary cholesterol, trans-fat, saturated-fat,</p> | <p><b>Green Mediterranean Diet</b></p> <p>Calorie restricted Green Mediterranean diet – richer in plants and polyphenols</p> <p>Women: 1200-1400kcal/day</p> <p>Men: 1500-1800kcal/day</p> <p>18 month gym membership -&gt; 45-60mins aerobic exercise + resistance training 3-4/week</p> <p>Lifestyle Group Sessions</p> <p>Energy Composition</p> <p>Fat: ~40% (mainly PUFA and MUFA)</p> <p>Carbohydrates: &lt;40g/day in 1<sup>st</sup> 2 months, then increased up to 80g/day.</p> <p>Less/avoid red + processed meats.</p> <p>Polyphenols: 1240mg/day (28g/day walnuts, 3-4 cups/day green tea, 100g/day Wolffia globosa green shake for dinner)</p> <p>Reduced Poultry intake</p> |

|                           |                                 |                                                  |                                                                                                                                  |                                                                                                                                                                                                         |                                                                                                                                                                                                                                                                                                                                                                                                                                                                                                                                                                                                                                                                                                                                  |                                                                                                                        |
|---------------------------|---------------------------------|--------------------------------------------------|----------------------------------------------------------------------------------------------------------------------------------|---------------------------------------------------------------------------------------------------------------------------------------------------------------------------------------------------------|----------------------------------------------------------------------------------------------------------------------------------------------------------------------------------------------------------------------------------------------------------------------------------------------------------------------------------------------------------------------------------------------------------------------------------------------------------------------------------------------------------------------------------------------------------------------------------------------------------------------------------------------------------------------------------------------------------------------------------|------------------------------------------------------------------------------------------------------------------------|
|                           |                                 |                                                  |                                                                                                                                  |                                                                                                                                                                                                         | sugars, salt and Increase intake of vegetables                                                                                                                                                                                                                                                                                                                                                                                                                                                                                                                                                                                                                                                                                   | Dietary guidance: Limit dietary cholesterol, trans-fat, saturated-fat, sugars, salt and Increase intake of vegetables. |
| <b>LCD vs LCarbD</b>      |                                 |                                                  |                                                                                                                                  |                                                                                                                                                                                                         |                                                                                                                                                                                                                                                                                                                                                                                                                                                                                                                                                                                                                                                                                                                                  |                                                                                                                        |
| Browning, 2011 [32]       | USA RCT                         | LCD vs LCarbD<br><br>Arm 1: LCarbD<br>Arm 2: LCD | University of Texas Southwestern Medical Centre                                                                                  | <b>LCarbD</b><br><br>Teaching session with dietician<br>7 days of detailed food diary<br>then 7 days of frozen meals prepared by research kitchen<br><br>Dietary Composition<br>Carbohydrates: <20g/day | <b>LCD</b><br><br>Teaching session with dietician<br>14 days of prepared meals by research.<br><br>Dietary composition<br>Kcal: ~1200kcal/day women, 1500kcal/day males                                                                                                                                                                                                                                                                                                                                                                                                                                                                                                                                                          |                                                                                                                        |
| <b>VLCKD</b>              |                                 |                                                  |                                                                                                                                  |                                                                                                                                                                                                         |                                                                                                                                                                                                                                                                                                                                                                                                                                                                                                                                                                                                                                                                                                                                  |                                                                                                                        |
| Cunha, 2020 [33]          | Brazil RCT<br>12/2016 – 05/2018 | VLCKD vs LCD<br><br>Arm 1: LCD<br>Arm 2: VLKCD   | Patients referred for weight loss treatment clinic of the Intituto Estadual de Diabetes e Endocrinologia, Rio De Janeiro, Brazil | <b>LCD</b><br><br>1400-1800kcal/day<br><br>Dietary Composition<br>Carbohydrates: 45-55%<br>Proteins: 15-25%<br>Fat: 25-35%<br>Fibre:20-40gr/d (vegetables/fruit)                                        | <b>VLKCD</b><br><br>600-800kcal/day<br>Ketogenic diet = VLCD (600-800kcal/day), low carbohydrates (<50gr/day from vegetables), lipids ( 10gr/day olive oil)<br><br>Dietary Composition<br>Carbohydrates: <50gr/d<br>Lipid: 10gr/d olive oil<br>Protein: 0.8-1.2gr/kg of body weight per day.<br>Vitamins (Vitamin A, 600 mcg; Vitamin D, 5.0 mcg; Vitamin E, 10mg; Vitamin B1, 1.2 mg; Vitamin B2, 1.3mg; Vitamin B6, 1.3mg; Vitamin C, 45 mg; Vitamin B5, 5.0mg; Nicotinamide, 16mg; Folic acid, 240 mcg; Biotin 30 mcg; Vitamin B12, 2.4 mcg; Vitamin K, 65 mcg; Iron, 14mg; Iodine, 130 mcg; Manganese, 2.3mg; Selenium, 34 mcg and trace elements (Sodium: 1g/d, Potassium:1.6 g/d, Calcium: 800 mg/d; Magnesium: 375 mg/d)) |                                                                                                                        |
| <b>LCD MUF vs LCD PUF</b> |                                 |                                                  |                                                                                                                                  |                                                                                                                                                                                                         |                                                                                                                                                                                                                                                                                                                                                                                                                                                                                                                                                                                                                                                                                                                                  |                                                                                                                        |

|                     |              |                                                                                                                          |            |                                                                                                                                                                                                                                                                                                                              |                                                                                                                                                                                                                                                                                                                       |
|---------------------|--------------|--------------------------------------------------------------------------------------------------------------------------|------------|------------------------------------------------------------------------------------------------------------------------------------------------------------------------------------------------------------------------------------------------------------------------------------------------------------------------------|-----------------------------------------------------------------------------------------------------------------------------------------------------------------------------------------------------------------------------------------------------------------------------------------------------------------------|
| Aller, 2014<br>[35] | Spain<br>RCT | LCD-MUF vs LCD-<br>PUF<br><br>Arm 1: LCD-MUF<br>(mono-<br>unsaturated fat)<br>Arm 2: LCD-PUF<br>(polyunsaturated<br>fat) | Not Stated | <b>LCD (enriched with<br/>monounsaturated fat)</b><br><br>1342kcal/day<br>180min/week aerobic exercise<br>(60min each)<br><br>Energy Composition<br>Carbohydrates: 46.6%<br>Lipids: 34.1%<br>Proteins: 19.2%<br><br>Distribution of Fats<br>Saturated Fat: 21.7%<br>Monounsaturated Fat: 67.5%<br>Polyunsaturated Fat: 10.8% | <b>LCD (enriched with polyunsaturated fats)</b><br><br>1459kcal/day<br>180min/week aerobic exercise (60min each)<br><br>Energy Composition<br>Carbohydrates: 45.7%<br>Lipids: 34.4%<br>Proteins: 19.9%<br><br>Distribution of Fat<br>Saturated Fat: 21.8%<br>Monounsaturated Fat: 55.5%<br>Polyunsaturated Fat: 22.7% |
|---------------------|--------------|--------------------------------------------------------------------------------------------------------------------------|------------|------------------------------------------------------------------------------------------------------------------------------------------------------------------------------------------------------------------------------------------------------------------------------------------------------------------------------|-----------------------------------------------------------------------------------------------------------------------------------------------------------------------------------------------------------------------------------------------------------------------------------------------------------------------|

Reference: [12,13,22,26–40]

**Table S2: Demographic characteristics of the Included Studies**

| Intervention Type | Study               | Sample Size (n)                           | Duration | Age (years)                                                        | Sex                           | Ethnicity           | Adherence                               | NAFLD %   | Diabetes % | Metabolic Syndrome % | BMI / Body Composition                         |
|-------------------|---------------------|-------------------------------------------|----------|--------------------------------------------------------------------|-------------------------------|---------------------|-----------------------------------------|-----------|------------|----------------------|------------------------------------------------|
| LCD vs Control    | Asghari, 2022 [41]  | T: 60<br>C: 30<br>LCD: 30                 | 12w      | T: 39.7 ± 6.3<br>C: 39.27 ± 5.51<br>LCD: 40.08 ± 7.08              | 21 F<br>39 M<br><br>65.0% M   | Middle Eastern      | 83.3%<br>4 FTFU<br>6 non-compliance     | 100%      | Not stated | Not stated           | C: 30.41 ± 3.39<br>LCD: 31.32 ± 3.31           |
|                   | 2020, Chen [36]     | Total: 44<br>C: 22<br>I: 22               | 2m       | T: 38.1±9.4                                                        | 16F<br>28M<br>63.6% M         | East Asian          | -                                       | 100%      | Not Stated | Not Stated           | All participants BMI >= 25                     |
|                   | Elias, 2010 [37]    | T: 31<br>Adherent: 17<br>Non-adherent: 14 | 6m       | T: 47.5 ± 11.6<br>Adherent: 47.6 ± 12.9<br>Non-adherent: 47.4 ± 10 | 16 F<br>15M<br><br>48.3% Male | Hispanic and Latino | NA                                      | 100%      | Not Stated | 45%                  | Adherent: 32.8 ± 4<br>Non-adherent: 34.5 ± 5.4 |
|                   | El-Kader, 2016 [38] | T: 100<br>C: 50<br>LCD: 50                | 3m       | T: 51.0 ± 5.6<br>C: 51.12 ± 5.86<br>LCD: 50.78 ± 5.34              | 30 F<br>70 M<br><br>70%M      | Middle Eastern      | Not stated                              | 100% NASH | Not Stated | Not Stated           | C: 31.76 ± 2.92<br>LCD: 32.35 ± 2.54           |
|                   | Promrat, 2009 [39]  | T: 31<br>C: 10<br>Lifestyle: 21           | 11m      | T: 48.5 ± 11.3<br>C: 47.6 ± 12.0<br>Lifestyle: 48.9 ± 10.9         | 9 F<br>22 M<br><br>70.9% M    | 84% Caucasian       | 90.2%<br>3 drop outs<br>lifestyle group | 100% NASH | 48% T2D    | 74%                  | C: 33.7 ± 4.7<br>Lifestyle: 33.6 ± 5.3         |

|                       |                                                                                          |                                                     |       |                                                                                   |                                |                               |                                                                                       |               |                                                              |            |                                                              |
|-----------------------|------------------------------------------------------------------------------------------|-----------------------------------------------------|-------|-----------------------------------------------------------------------------------|--------------------------------|-------------------------------|---------------------------------------------------------------------------------------|---------------|--------------------------------------------------------------|------------|--------------------------------------------------------------|
| TMR vs Control        | Taylor, 2018 [12,13]                                                                     | T: 90<br>C: 26<br>I: 64                             | 12m   | T: 52.8 ± 7.9                                                                     | 38F<br>52M<br><br>57.8%<br>M   | 98.3%<br>Caucasian            | 78.5%<br>32/149 TMR<br>group withdrew                                                 | Not<br>stated | 100%<br>Mean<br>duration:<br>3.0 ± 1.7<br>years              | Not stated | C: 34.2 ± 4.3<br>LCD: 35.1 ± 4.5<br>T: 34.7 ± 7.4            |
|                       | Sattar, 2022 [40]                                                                        | T: 25<br>C: 12<br>I: 13<br><br>Observational:<br>25 | 3m    | T: 45.8 ± 11.1                                                                    | 12 F<br>13 M<br>52%<br>M       | South<br>Asian                | 84%<br><br>4/25 withdrew<br>during RCT<br>2 Further<br>withdrew during<br>delayed TDR | Not<br>Stated | 100%:<br>mean<br>duration<br>since<br>diagnosis<br>1.9 years | Not stated | T: 32.1 ± 3.8<br>TDR: 32.6 ± 4.4<br>C: 31.6 ± 3.3            |
| MED LCD vs<br>Control | CENTRAL<br>Gepner, 2019<br>[28,29]                                                       | T: 278<br>LFD: 139<br>MED: 139                      | 18m   | T: 47.9 ± 9.3                                                                     | 31 F<br>247 M<br>89%<br>M      | Middle<br>Eastern -<br>Israel | 86.3%<br>LFD: 118<br>MED: 122                                                         | 53%           | 11%                                                          | 40%        | 30.8 ± 3.8                                                   |
|                       | FLiO<br>Marin-Alejandre,<br>2019/2022<br>(Nutrients / Liver<br>International)<br>[30,31] | T: 98<br>AHA: 48<br>FLiO: 50                        | 6-24m | T: 50.1 ± 9.3<br>AHA: 51.1 ± 9.8<br>FLiO: 49.2 ± 8.9                              | 47 F<br>51 M<br><br>52%<br>M   | Caucasian                     | 6m: 77.6%<br>AHA 37, FLiO 39<br>24m: 60.4%<br>AHA 32, FLiO 26                         | 100%          | 12.2%                                                        | Not Stated | AHA: 33.7 ± 4<br>FLiO: 33.3 ± 4                              |
|                       | Montemayor, 2022<br>[26]                                                                 | T: 128<br>CD: 43<br>MD-HMF: 43<br>MD-PA: 42         | 12m   | T: 52.9 ± 7.27<br>CD: 54.1 ± 8.9<br>MD-HMF: 52.3<br>± 7.1<br>MD-PA: 52.2 ±<br>5.8 | 47 F<br>81 M<br><br>63.3%<br>M | Caucasian                     | Not stated                                                                            | 100%          | 24.2%                                                        | 100%       | CD: 33.6 ± 3.7<br>MD-HMF: 33.9 ±<br>3.9<br>MD-PA: 33.4 ± 3.1 |
|                       | Ristic-Medic, 2020<br>[34]                                                               | T: 27<br>LFD: 13<br>MED: 14                         | 3m    | T: 33.6 ± 4.2<br>LFD: 34.42 ±<br>4.66<br>MED: 32.92 ±<br>3.78                     | 0 F<br>27 M<br><br>100%<br>M   | Caucasian                     | 88.9%<br>LFD: 12<br>MED: 12                                                           | 100%          | 0%                                                           | Not Stated | LFD: 30.17 ± 2.28<br>MED: 30.43 ± 1.81                       |

|                |                                |                                             |     |                                                   |                             |                         |                                                         |       |            |            |                                          |
|----------------|--------------------------------|---------------------------------------------|-----|---------------------------------------------------|-----------------------------|-------------------------|---------------------------------------------------------|-------|------------|------------|------------------------------------------|
| Green-MED      | DIRECT-Plus Meir, 2021 [22,27] | T: 294<br>C: 98<br>MED: 98<br>Green-MED: 98 | 18m | T: 51.1 ± 10.5                                    | 35 F<br>259 M<br>88.1% M    | Middle Eastern - Israel | 89.8% at 18 months<br>C: 91<br>MED: 84<br>Green-MED: 89 | 62%   | 10.9%      | Not Stated | 31.3 ± 4<br><br>58.8% with obesity       |
| LCarbD         | Browning, 2011 [32]            | T: 18<br>LCarbD: 9<br>LCD: 9                | 2w  | T: 44.5 ± 11.5<br>LCarbD: 42 ± 11<br>LCD: 47 ± 12 | 13F<br>5M<br><br>27.8% Male |                         | 100%                                                    | 100%  | Not Stated | Not Stated | LCardD: 36 ± 4<br>LCD: 34 ± 9            |
| VLCKD          | Cunha, 2020 [33]               | T: 46<br>LCD: 24<br>VLCKD: 22               | 2m  | T: 40.3 ± 11.3                                    | 38F<br>8M<br><br>17.4% M    | Hispanic and Latino     | 84.8%<br>LCD: 19<br>VLCKD: 20                           | 92.3% | 0%         | Not Stated | 35.7 ± 4.3                               |
| LCD MUF vs PUD | Aller, 2014 [35]               | T: 44<br>Diet M: 26<br>Diet P: 18           | 3m  | T: 49.3 ± 16.7                                    | 32 F<br>12 M<br><br>28.1% M | Caucasian               | Not stated                                              | 100%  | 0%         | Not stated | Diet M: 39.4 ± 5.4<br>Diet P: 38.9 ± 5.3 |

Reference: [12,13,22,26–40]

**Table S3: Studies Nearly meeting Inclusion**

| <b>Study</b>                                                  | <b>Intervention</b>                                                      | <b>Reason exclusion</b>                       |
|---------------------------------------------------------------|--------------------------------------------------------------------------|-----------------------------------------------|
| Zade et al, 2016, Liver International [1]                     | RCT<br>DASH Diet                                                         | Calorie reduction did not meet LCD definition |
| Luukkonen et al, 2020, PNAS [2]                               | Low-calorie Ketogenic Diet                                               | No control group                              |
| Ryan et al, 2007, Diabetes Care [3]                           | RCT post-hoc analysis<br>LCD either 60% carb/25% fat or 40% carb/45% fat | Does not define NAFLD prevalence.             |
| Scragg, Clinical and Translational Gastroenterology, 2020 [4] | VLCD                                                                     | No control group                              |
| CALERIE, Larson- Meyer, Obesity, 2008 [5]                     | RCT<br>LCD or Control                                                    | No NAFLD participants                         |
| Guo, Journal of Obesity, 2018 [6]                             | RCT<br>LCD vs Control                                                    | No NAFLD participants                         |
| Shirai, Obesity Research & Clinical Practice, 2013 [7]        | RCT<br>LCD with partial use of formula diet or conventional LCD          | No NAFLD participants                         |
| DIADEM-I, Taheri, 2020 [8]                                    | RCT<br>TMR vs control                                                    | No NAFLD participants                         |
| DROPLET, BMJ [9]                                              | RCT<br>TMR                                                               | Did not define NAFLD prevalence               |

**References:**

- [1] Razavi Zade M, Telkabadi MH, Bahmani F, Salehi B, Farshbaf S, Asemi Z. The effects of DASH diet on weight loss and metabolic status in adults with non-alcoholic fatty liver disease: A randomized clinical trial. *Liver Int* 2016;36:563–71. <https://doi.org/10.1111/liv.12990>.
- [2] Luukkonen PK, Dufour S, Lyu K, Zhang XM, Hakkarainen A, Lehtimäki TE, et al. Effect of a ketogenic diet on hepatic steatosis and hepatic mitochondrial metabolism in nonalcoholic fatty liver disease. *Proc Natl Acad Sci U S A* 2020;117:7347–54. <https://doi.org/10.1073/PNAS.1922344117>.
- [3] Ryan MC, Abbasi F, Lamendola C, Carter S, Tracey Lynn McLaughlin. Fat Restriction in Insulin-Resistant Adults. *Diabetes Care* 2007;30:1075–80. <https://doi.org/10.2337/dc06-2169>. Abbreviations.

- [4] Scragg J, Avery L, Cassidy S, Taylor G, Haigh L, Boyle M, et al. Feasibility of a Very Low Calorie Diet to Achieve a Sustainable 10% Weight Loss in Patients With Nonalcoholic Fatty Liver Disease. *Clin Transl Gastroenterol* 2020;11:e00231. <https://doi.org/10.14309/ctg.0000000000000231>.
- [5] Larson-Meyer DE, Newcomer BR, Heilbronn LK, Volaufova J, Smith SR, Alfonso AJ, et al. Effect of 6-month calorie restriction and exercise on serum and liver lipids and markers of liver function. *Obesity* 2008;16:1355–62. <https://doi.org/10.1038/oby.2008.201>.
- [6] Guo X, Xu Y, He H, Cai H, Zhang J, Li Y, et al. Effects of a Meal Replacement on Body Composition and Metabolic Parameters among Subjects with Overweight or Obesity. *J Obes* 2018;2018. <https://doi.org/10.1155/2018/2837367>.
- [7] Shirai K, Saiki A, Oikawa S, Teramoto T, Yamada N, Ishibashi S, et al. The effects of partial use of formula diet on weight reduction and metabolic variables in obese type 2 diabetic patients - Multicenter trial. *Obes Res Clin Pract* 2013;7:e43–54. <https://doi.org/10.1016/j.orcp.2012.03.002>.
- [8] Taheri S, Zaghoul H, Chagoury O, Elhadad S, Ahmed SH, El Khatib N, et al. Effect of intensive lifestyle intervention on bodyweight and glycaemia in early type 2 diabetes (DIADEM-I): an open-label, parallel-group, randomised controlled trial. *Lancet Diabetes Endocrinol* 2020;8:477–89. [https://doi.org/10.1016/S2213-8587\(20\)30117-0](https://doi.org/10.1016/S2213-8587(20)30117-0).
- [9] Astbury NM, Aveyard P, Nickless A, Hood K, Corfield K, Lowe R, et al. Doctor Referral of Overweight People to Low Energy total diet replacement Treatment (DROPLET): Pragmatic randomised controlled trial. *BMJ* 2018;362. <https://doi.org/10.1136/bmj.k3760>.

## Supplementary Results S1

### 3.7 Other LCD Interventions

**3.71 Very Low Calorie Ketogenic Diet** An open-label RCT assessed the very-low calorie ketogenic diet (VLCKD) vs LCD. The trial recruited 39 participants (20 = VLCKD, 19 LCD) to a 2 month intervention. The VLCKD intervention involved a 2-month ketogenic phase with 600-800kcal/day, low carbohydrate intake (<50gr/day), this was based on a commercial weight loss programme (Pronokal method) The participants were 40.3 ± 11.3 years old, predominantly female (82.6% F, 17.4% M), 92.3% were with NAFLD, and average BMI at baseline was 35.7 ± 4.3kg/m<sup>2</sup>. Two authors in the study author list were personnel of Pronokal Group Brasil, and were involved in the study design and revision of the manuscript, potentially highlighting a conflict of interest. The corresponding author also works for the Pronokal group. This trial showed that ALT, AST and GGT did not significantly differ between groups. Percentage Fat fraction via MRI PDFF reduced to a greater extent with VLCKD (-4.77 ± 4.26%) than LCD (-0.79 ± 1.76) ( $p = 0.0006$  absolute reduction between groups). There were improvements in NAFLD prevalence in the VLCKD group compared to LCD ( $p = 0.0351$ ). BMI and Body weight reduced to a greater extent in the VLCKD (VLCKD: -9.7 ± 3.88kg, LCD: -1.67 ± 2.22kg,  $p < 0.0001$ ) [41].



*3.72 Low-Calorie Diet vs Low-Carbohydrate Diet* Browning et al investigated LCD vs Low Carbohydrate Diet (LCarbD). The trial was two weeks duration and recruited 18 participants with NAFLD and obesity [52]. This trial was in the USAs, most participants were female (13F, 5 M). Calories reduced more significantly in LCD, but this was not significant. LCarbD had 8% energy from carbs, LCD was 50% from carbs. LCarbD had 33% energy from protein whereas LCD was 16%. LCarbD was 59% whereas LCD was 34%. Following two weeks of intervention ALT, AST and AST:ALT ratio change did not significantly vary between groups. MR-Spectroscopy determined liver fat significantly reduced in LCarbD group vs LCD ( $p = 0.049$ ). BMI and body weight did not significantly differ between groups in terms of change.

*3.73 High monounsaturated Fat LCD (LCD-MUF) vs High polyunsaturated Fat LCD (LCD-PUF)* Aller et al conducted a RCT in Spain evaluated high monounsaturated fat LCD vs high polyunsaturated fat LCD in participants with NAFLD [32]. Both groups underwent a calorie restricted diet with 180min/week aerobic exercise. LCD-PUF was high in polyunsaturated fat; LCD-MUF was higher in monounsaturated fat. Intervention was 3 months, 44 participants were enrolled (LCD-mono 26, LCD-poly 18), average age was  $49.3 \pm 16.7$ , most participants were female (28.1%). All participants had NAFLD, no participants had diabetes. Attrition rate and prevalence of metabolic syndrome not reported. Average BMI at baseline was 38.9 – 39.4. Between group statistics were not reported. ALT, AST and GGT significantly reduced in both groups. BMI, Body weight and Body Fat % significantly reduced in both groups.
